# Supplementary material
Source: publisher site journal article supplement (https://static.cambridge.org/content/id/urn:cambridge.org:id:article:S0007114519000679/resource/name/S0007114519000679supp002.xlsx)
Supplement: Supplementary file 1 [file S0007114519000679supp002.xlsx]

## Sheet: Table S.1
Supplementary Table 1. Multiple linear regression analysis for associations between the genotypes of rs1761667 and metabolic biomarkers
		Unadjusted			Sex- and age- adjusted
		Standardized β	Unstandardized β (95%CI)	p	Standardized β	Unstandardized β (95%CI)	p
WC	GG	reference			reference
	GA	0.004	0.075 (–1.786, 1.937)	0.94	–0.014	–0.289 (–2.089, 1.512)	0.75
	AA	–0.010	–0.370 (–3.812, 3.071)	0.83	–0.026	–0.973 (–4.301, 2.354)	0.57
Triglycerides*	GG	reference			reference
	GA	–0.034	–0.020 (–0.213, 0.145)	0.72	–0.027	–0.045 (–0.220, 0.130)	0.61
	AA	–0.300	–0.095 (–0.633, 0.033)	0.08	–0.102	–0.322 (–0.646, 0.002)	0.05
HDL-C*	GG	reference			reference
	GA	0.004	0.006 (–0.076, 0.085)	0.913	0.03	0.023 (–0.053, 0.098)	0.56
	AA	0.035	0.025 (–0.114, 0.184)	0.65	0.039	0.055 (–0.086, 0.195)	0.45
Blood glucose†	GG	reference			reference
	GA	0.047	0.031 (–0.095, 0.190)	0.52	0.012	0.019 (–0.120, 0.157)	0.79
	AA	0.152	0.054 (–0.110, 0.414)	0.26	0.039	0.109 (–0.145, 0.363)	0.4
CD36, cluster of differentiation 36; SNP, single nucleotide polymorphism; 95%CI, 95% conficence interval; WC, waist circumference; HDL-C, high-density lipoprotein cholesterol.
*This analysis was performed after excluding those who took medications for dyslipidemia (n = 132).
†This analysis was performed after excluding those who took medications for diabetes (n = 33).

## Sheet: Table S.2
Supplementary Table 2. Multiple linear regression analysis for associations between the genotypes of rs1527483 and metabolic profiles
		Unadjusted			Sex- and age- adjusted
		Standardized β	Unstandardized β (95%CI)	p	Standardized β	Unstandardized β (95%CI)	p
WC	CC	reference			reference
	CT	–0.048	–1.010 (–2.906, 0.887)	0.3	–0.046	–0.975 (–2.805, 0.855)	0.3
	TT	–0.024	–0.019 (–5.506, 3.143)	0.59	–0.034	–1.649 (–5.821, 2.524)	0.44
Triglycerides*	CC	reference			reference
	CT	0.055	0.032 (–0.129, 0.241)	0.55	0.048	0.085 (–0.095, 0.265)	0.35
	TT	–0.022	–0.006 (–0.432, 0.387)	0.91	–0.016	–0.061 (–0.459, 0.337)	0.76
HDL-C*	CC	reference			reference
	CT	0.074	0.094 (–0.008, 0.156)	0.08	0.074	0.059 (–0.019, 0.136)	0.14
	TT	–0.050	–0.029 (–0.232, 0.131)	0.59	–0.016	–0.027 (–0.199, 0.144)	0.75
Blood glucose†	CC	reference			reference
	CT	–0.053	–0.033 (–0.198, 0.093)	0.48	–0.043	–0.067 (–0.208, 0.074)	0.35
	TT	–0.130	–0.037 (–0.458, 0.198)	0.44	–0.045	–0.161 (–0.478, 0.157)	0.32
CD36, cluster of differentiation 36; SNP, single nucleotide polymorphism; 95%CI, 95% conficence interval; WC, waist circumference; HDL-C, high-density lipoprotein cholesterol.
*This analysis was performed after excluding those who took medications for dyslipidemia (n = 132).
†This analysis was performed after excluding those who took medications for diabetes (n = 33).

## Sheet: Table S.3
Supplementary Table 3. Multiple logistic regression analysis for associations between the genotypes of rs1761667 and metabolic disorders
		Unadjusted		Sex- and age- adjusted
		OR (95%CI)	p	OR (95%CI)	p
Obesity*	GG	1	–	1	–
	GA	1.21 (0.82, 1.78)	0.35	1.10 (0.72, 1.68)	0.65
	AA	1.15 (0.54, 2.33)	0.71	0.96 (0.43, 2.06)	0.92
Dyslipidemia†	GG	1	–	1	–
	GA	0.87 (0.59, 1.27)	0.46	0.83 (0.57, 1.22)	0.35
	AA	0.64 (0.30, 1.30)	0.23	0.60 (0.28, 1.22)	0.17
Diabetes‡	GG	1	–	1	–
	GA	1.42 (0.79, 2.52)	0.24	1.31 (0.73, 2.34)	0.37
	AA	1.39 (0.45, 3.61)	0.52	1.22 (0.39, 3.22)	0.7
CD36, cluster of differentiation 36; SNP, single nucleotide polymorphism; OR, odds ratio; 95%CI, 95% confidence interval.
*Obesity was defined as waist circumference ≥ 85 cm in men or ≥ 90 cm in women.
†Dyslipidemia was defined as triglyceride (TG) ≥ 150 mg/dl (1.69 mmol/l), high-density lipoprotein cholesterol (HDL-C) ≤ 40 mg/dl (1.03 mmol/l), or use of medications for dyslipidemia.
‡Diabetes mellitus (DM) was defined as fasting blood glucose ≥ 100 mg/dl (5.55 mmol/l) or use of medications for DM

## Sheet: Table S.4
Supplementary Table 4. Multiple logistic regression analysis for associations between the genotypes of rs1527483 and metabolic disorders
		Unadjusted		Sex- and age- adjusted
		OR (95%CI)	p	OR (95%CI)	p
Obesity*	CC	1	–	1	–
	CT	0.71 (0.41, 1.06)	0.1	0.68 (0.43, 1.04)	0.08
	TT	0.50 (0.16, 1.30)	0.18	0.39 (0.12, 1.09)	0.09
Dyslipidemia†	CC	1	–	1	–
	CT	0.98 (0.67, 1.44)	0.92	0.97 (0.66, 1.43)	0.88
	TT	1.00 (0.40, 2.38)	0.99	0.96 (0.38, 2.31)	0.93
Diabetes‡	CC	1	–	1	–
	CT	0.65 (0.34, 1.18)	0.17	0.62 (0.32, 1.15)	0.14
	TT	0.30 (0.02, 1.51)	0.25	0.27 (0.0, 1.37)	0.21
CD36, cluster of differentiation 36; SNP, single nucleotide polymorphism; OR, odds ratio; 95%CI, 95% confidence interval.
*Obesity was defined as waist circumference ≥ 85 cm in men or ≥ 90 cm in women.
†Dyslipidemia was defined as triglyceride (TG) ≥ 150 mg/dl (1.69 mmol/l), high-density lipoprotein cholesterol (HDL-C) ≤ 40 mg/dl (1.03 mmol/l), or use of medications for dyslipidemia.
‡Diabetes mellitus (DM) was defined as fasting blood glucose ≥ 100 mg/dl (5.55 mmol/l) or use of medications for DM
